# Supplementary material
Source: MDPI journal article supplement (https://www.mdpi.com/2673-6209/4/1/6)
Supplement: s1 [file s1]

## Supplementary Materials

# Kinetic, Isothermal, and Thermodynamic Analyses of Adsorption of Humic Acid on Quaternized Porous Cellulose Beads

Kana Uchiyama <sup>1</sup>, Hiromichi Asamoto <sup>2</sup>, Hiroaki Minamisawa <sup>2</sup> and Kazunori Yamada <sup>3,\*</sup>

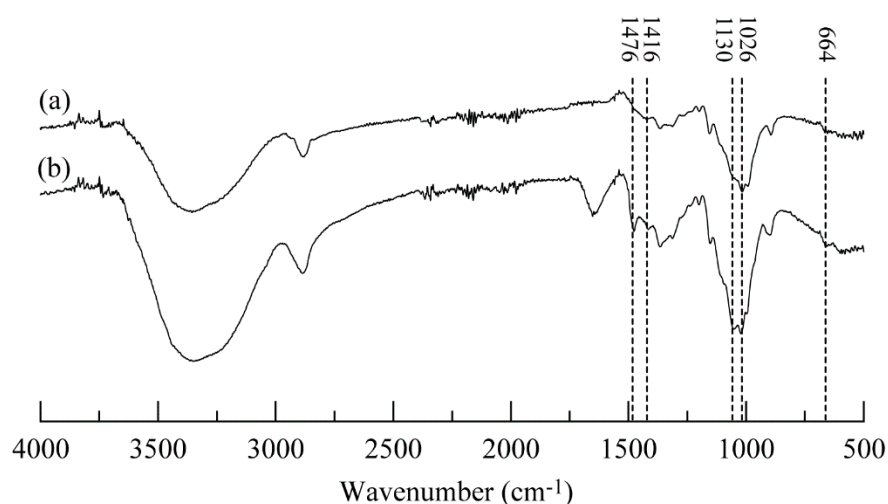

**Figure S1.** The FT-IR spectra of (a) the untreated cellulose beads and (b) the quaternized cellulose beads with 0.524 mmol/g.

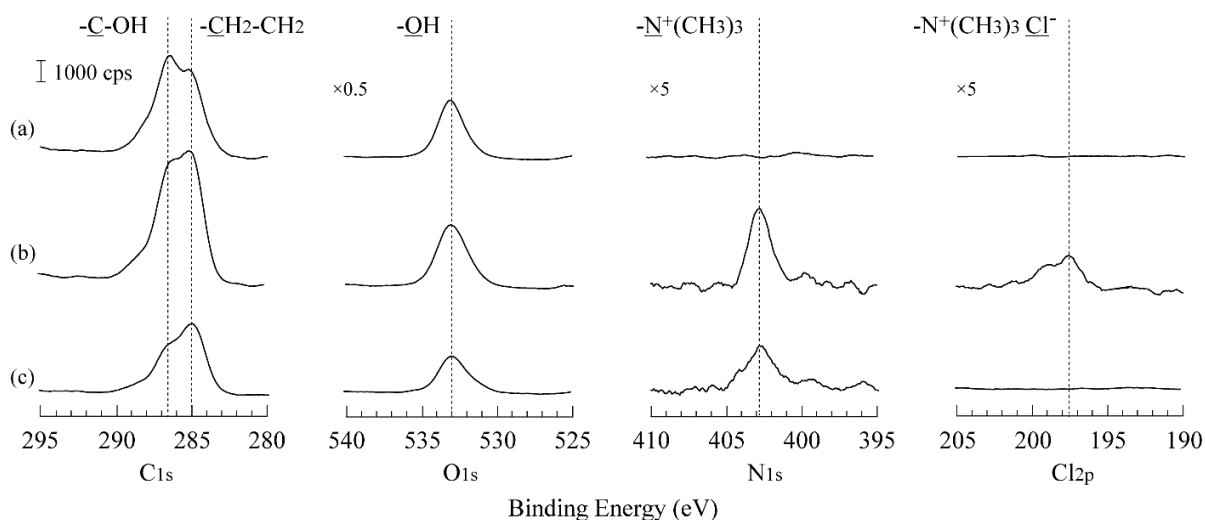

**Figure S2.** The XPS high-resolution spectra of C<sub>1s</sub>, O<sub>1s</sub>, N<sub>1s</sub>, and Cl<sub>2p</sub> for (a) the untreated cellulose beads and the quaternized cellulose beads with 0.231 mmol/g (b) before and (c) after treatment with NaOH.

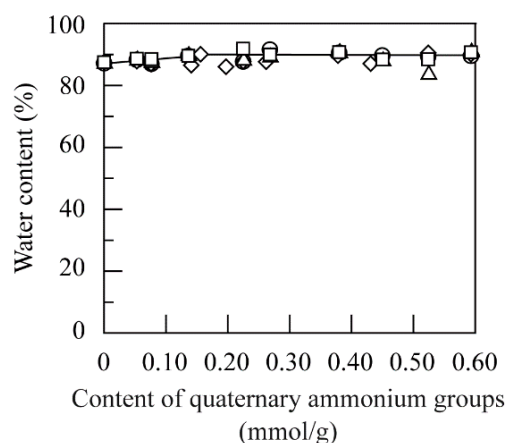

**Figure S3.** Change in the water content with the content of quaternary ammonium groups at 25°C.

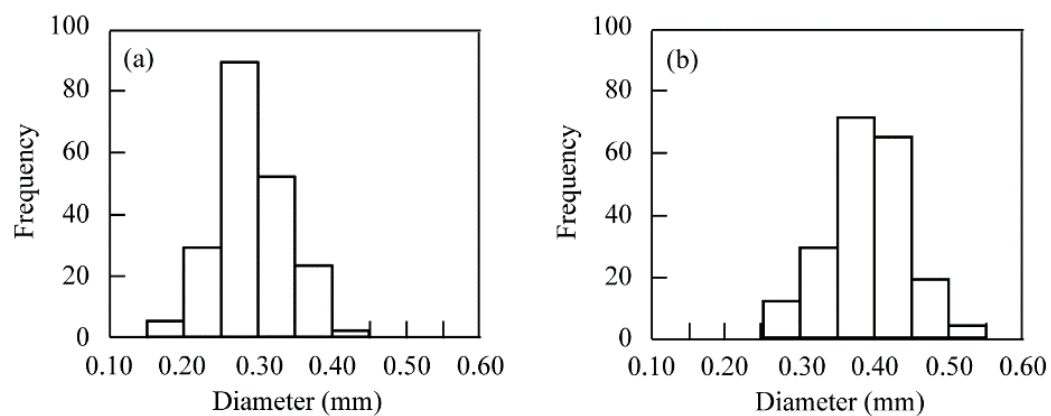

**Figure S4.** The particle distributions for the quaternized cellulose beads with 0.231 mmol/g in the (a) dry and (b) water-swollen state at 25°C.

**Table S1.** The particle sizes of the untreated and quaternized cellulose beads with different contents of quaternary ammonium groups in the dry and water-swollen states.

| $A_{Qcell}$ (mmol/g-Q-cell)         | untreated | 0.053 | 0.231 | 0.380 | 0.524 |
|-------------------------------------|-----------|-------|-------|-------|-------|
| in the dry state (mmol/g)           |           |       |       |       |       |
| minimum (mm)                        | 0.185     | 0.185 | 0.184 | 0.193 | 0.193 |
| maximum (mm)                        | 0.435     | 0.441 | 0.425 | 0.440 | 0.400 |
| average (mm)                        | 0.298     | 0.299 | 0.293 | 0.302 | 0.294 |
| standard deviation (mm)             | 0.046     | 0.050 | 0.048 | 0.041 | 0.038 |
| in the water swollen state (mmol/g) |           |       |       |       |       |
| minimum (mm)                        | 0.285     | 0.278 | 0.277 | 0.288 | 0.283 |
| maximum (mm)                        | 0.577     | 0.563 | 0.550 | 0.545 | 0.565 |
| average (mm)                        | 0.395     | 0.394 | 0.393 | 0.405 | 0.399 |
| standard deviation (mm)             | 0.047     | 0.049 | 0.050 | 0.045 | 0.047 |

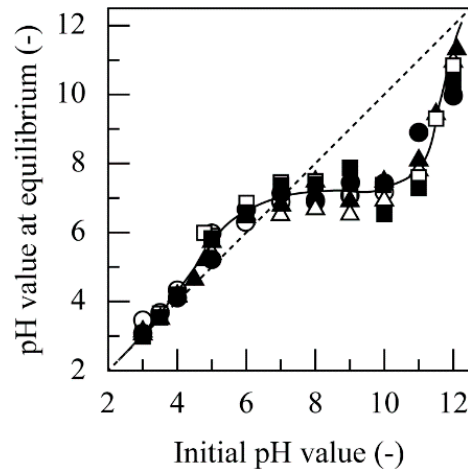

**Figure S5.** Changes in the pH value for adsorption on the quaternized cellulose beads with 0.053 (○), 0.095 (●), 0.156 (△), 0.231 (▲), 0.380 (□), and 0.524 (■) mmol/g-Qcell in a 100 mg/L HA solution at 25°C.

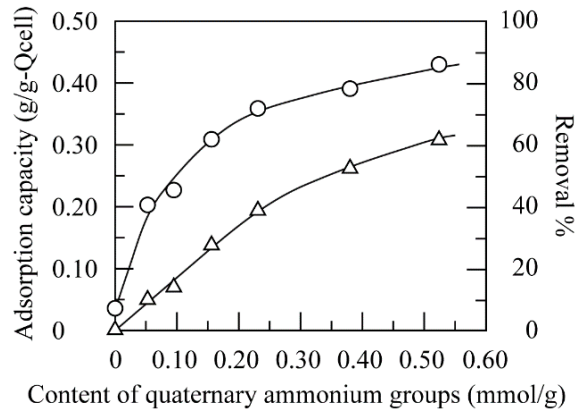

**Figure S6.** Changes in the adsorption capacity and removal % with the content of quaternary ammonium groups in a 100 mg/L HA solution at pH 3.0 (○) and 6.0 (△).

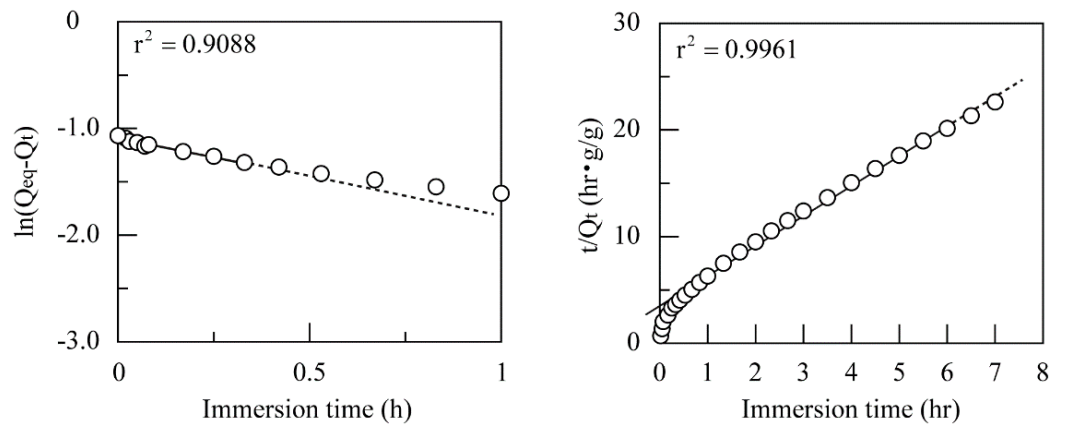

**Figure S7.** Determination of (a) the pseudo-first order constant,  $k_1$ , and (b) pseudo-second order constant,  $k_2$ , for adsorption of HA on the quaternized cellulose beads with 0.231 mmol/g in a 100 mg/L HA solution at pH 3.0 and 30°C.
